# Supplementary material for: Vitamin B12 model complex catalyzed methyl transfer reaction to alkylthiol under electrochemical conditions with sacrificial electrode
Source: Royal Society of Chemistry journal article supplement (doi:10.1039/b909163g), 2009-01-01
Supplement: b909163g.pdf [file b909163g.pdf]

**Supplementary Information (ESI) for:**

**Vitamin B<sub>12</sub> model complex catalyzed methyl transfer reaction  
to alkylthiol under electrochemical conditions with sacrificial  
electrode**

**Ling Pan, Hisashi Shimakoshi, Takahiro Masuko and Yoshio Hisaeda\***

*Department of Chemistry and Biochemistry, Graduate School of Engineering,  
Kyushu University, Fukuoka 819-0395, Japan*

Corresponding author; e-mail: [yhisatcm@mail.cstm.kyushu-u.ac.jp](mailto:yhisatcm@mail.cstm.kyushu-u.ac.jp)

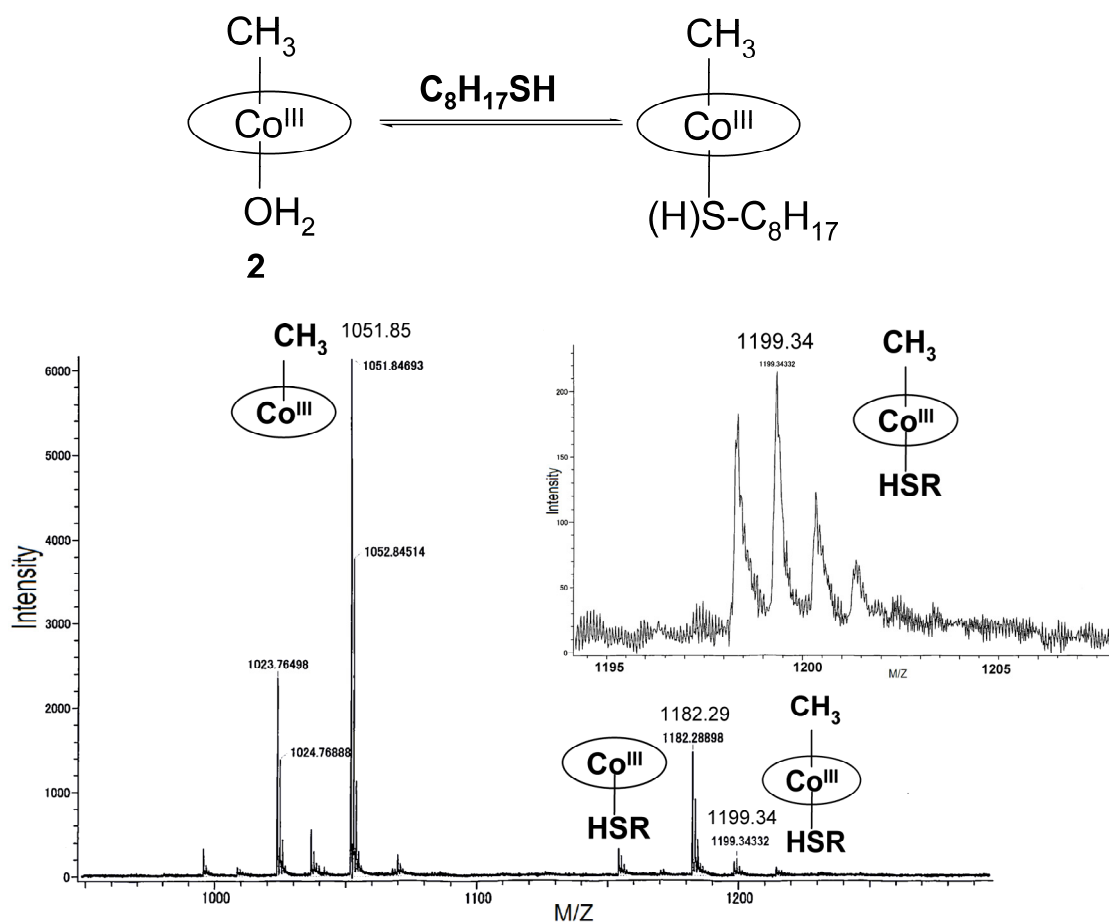

**Fig. S1** Interaction of  $[(\text{CH}_3)(\text{H}_2\text{O})\text{Co}(\text{III})7\text{C}_1\text{ester}]\text{ClO}_4$  **2** and 1-octanethiol observed from ESI MS spectra in DMF with a 1:100 mol-equiv. for the complex **2** and 1-octanethiol.

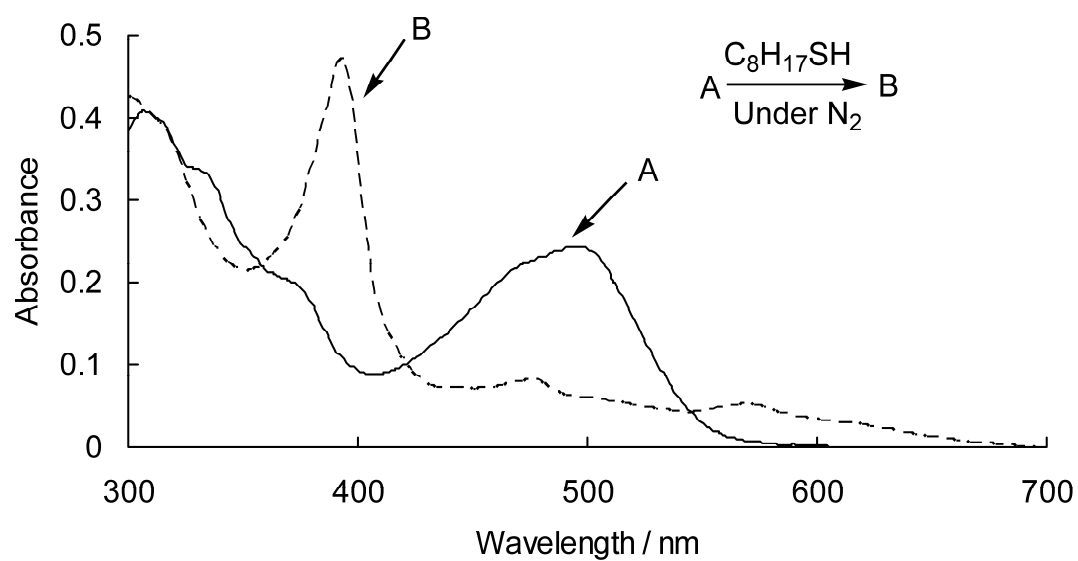

**Fig. S2** Interaction of  $[(\text{CH}_3)(\text{H}_2\text{O})\text{Cob}(\text{III})7\text{C}_1\text{ester}]\text{ClO}_4$  **2** and 1-octanethiol observed from electronic spectra in DMF under anerobic conditions. (A): complex **2** ( $15.0 \times 10^{-5}$  M) in DMF; (B): after 1-octanethiol ( $8.7 \times 10^{-3}$  M) was immediately added.

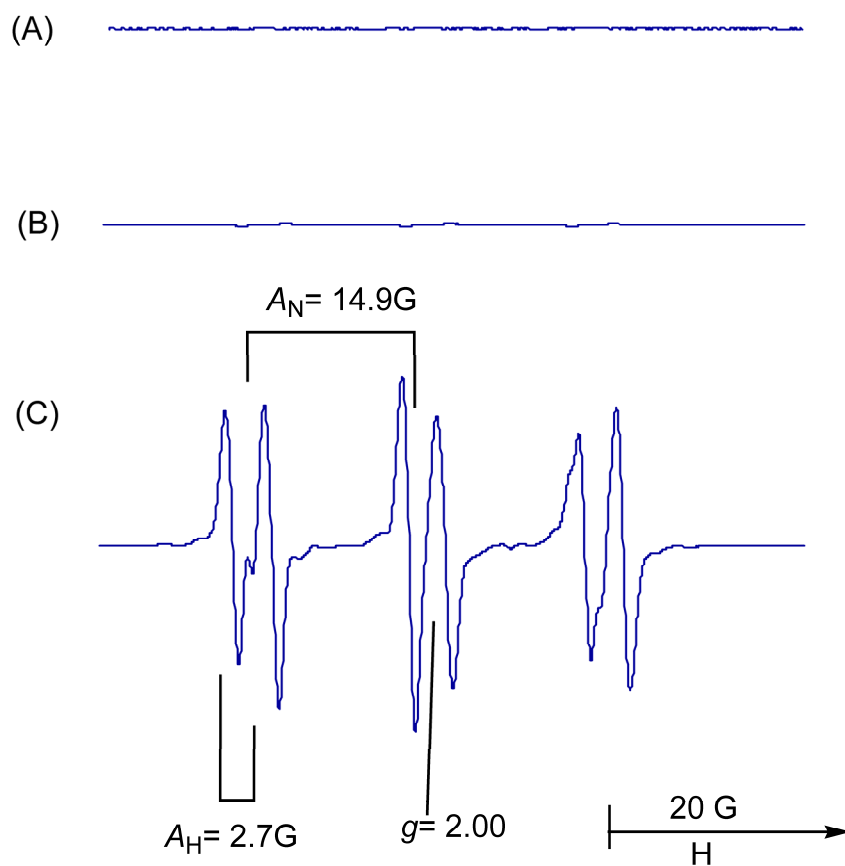

**Fig. S3** ESR spectrum of (A): the DMF solution of  $[(\text{CH}_3)(\text{H}_2\text{O})\text{Cob}(\text{III})7\text{C}_1\text{ester}]\text{ClO}_4 \mathbf{2}$  ( $2.4 \times 10^{-3}$  M) containing  $2.3 \times 10^{-1}$  M of PBN in the dark; (B): after 1-octanethiol ( $1.1 \times 10^{-1}$  M) was added; (C): the solution of (A) was irradiated with visible light for 1 min. 1 G=0.1 mT
